# Supplementary material for: Inhibition of Listeria monocytogenes by Phage Lytic Enzymes Displayed on Tailored Bionanoparticles
Source: MDPI journal article supplement (doi:10.3390/foods11060854), 2022-03-17
Supplement: s1 [file s1]

## Supplementary Materials

Table S1. Gene sequences of lysin293 and the amidase domain, amidase293.

>Endolysin 1 (Full length), ORF 25, phage vB\_LmoS\_293, Coordinates: 19966..20916  
MSVLQYNYINKNQFSRPGYKLLRVSKIVMHYTANPGASADNHRRYFRDLKERYASAHIFIDDNEAICIPLNEVAY  
HANERSCKLTALQASTSYRGGNANLTSIGIEMCLDKNWNITAATFNRSVDVAAELCKTYDLTPSDIIRHYDVTG  
KNCPAPWVAKPSELTRFRNAVNAKLKGASQKNRHDGKVVD SAPLLTKMDFKSSPFRMYKSGTEFLVYEHNQ  
YWKTYIDDKLYMYKSFCDVVTKKDAKGRIKVRISAKDLRIPVWNNTKLSSGKIKWYAPNTKLAWYNNKGKY  
LELWYPSDGWYYTANYFLKVDANSSPRH MATGKGAAASTQEGKSQPFKVTGPFPDPATWLEWSRQWQGTE  
GNGHAAASGIPGLDALAGVKIAPAQLGDIQQR YMKDFSALWQAMAEGKAEATGPLHRRFAGDAWRTNLPY  
RFAAAFYLLNARALTELADAVEADAKTRQIRFAISQWVDAMSPANFLATNPEAQRLIESGGESLRAGVRNM  
MEDLTRGKISQTDES AFEVGRNVA VTEGAVVFENEYFQLLQYKPLTDKVHARPLL MVPPCINKYYIDLQPESSL  
VRHVVEQGHTVFLVSWRNP DASMAGSTWDDYIEHAAIRAIEVARDISGQDKINVLGFCVGGTIVSTALAVLAA  
RGEHPAASVTLLTLLDFADTGILDVFVDEGHVQLREATLGGGAGAPCALLRGLELANTFSFLRPNDLVWNYVV  
DNYLKGNTPVPFDLLFWNGDATNLP GPWYCWYLRHTYLQNELKVP GKLTVC GVPVDLASIDVPTYIYGSREDHI  
VPWTAAYASTALLANKLRFVLGASGHIAGVINPPAKNKRSHWTNDALPESPQQWLAGAIEHHGSWWPDWTA  
WLAGQAGAKRAAPANYGNARYRAIEPAPGRYVKAKA

>Endolysin (Amidase Domain), ORF 25, phage vB\_LmoS\_293, Coordinates: 19966..20502  
MSVLQYNYINKNQFSRPGYKLLRVSKIVMHYTANPGASADNHRRYFRDLKERYASAHIFIDDNEAICIPLNEVAY  
HANERSCKLTALQASTSYRGGNANLTSIGIEMCLDKNWNITAATFNRSVDVAAELCKTYDLTPSDIIRHYDVTG  
KNCPAPWVAKPSELTRFRNAVNAKLKGAVDANSSPRH MATGKGAAASTQEGKSQPFKVTGPFPDPATWLEW  
SRQWQGTEGNGHAAASGIPGLDALAGVKIAPAQLGDIQQR YMKDFSALWQAMAEGKAEATGPLHRRFAG  
DAWRTNLPYRFAAAFYLLNARALTELADAVEADAKTRQIRFAISQWVDAMSPANFLATNPEAQRLIESGGES  
LRAGVRNMMEDLTRGKISQTDES AFEVGRNVA VTEGAVVFENEYFQLLQYKPLTDKVHARPLL MVPPCINKYYI  
LDLQPESSLVRHVVEQGHTVFLVSWRNP DASMAGSTWDDYIEHAAIRAIEVARDISGQDKINVLGFCVGGTIVS  
TALAVLAARGEHPAASVTLLTLLDFADTGILDVFVDEGHVQLREATLGGGAGAPCALLRGLELANTFSFLRPND  
LVWNYVVDNYLKGNTPVPFDLLFWNGDATNLP GPWYCWYLRHTYLQNELKVP GKLTVC GVPVDLASIDVPTYI  
YGSREDHIVPWTAAYASTALLANKLRFVLGASGHIAGVINPPAKNKRSHWTNDALPESPQQWLAGAIEHHGS  
WWPDWTAWLAGQAGAKRAAPANYGNARYRAIEPAPGRYVKAKA

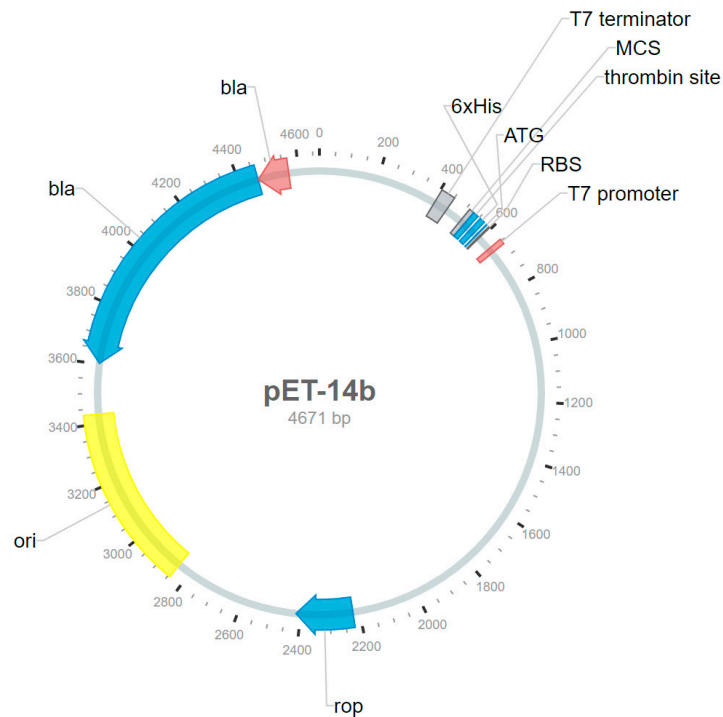

Figure S1: pET-14b vector used in this experiment.

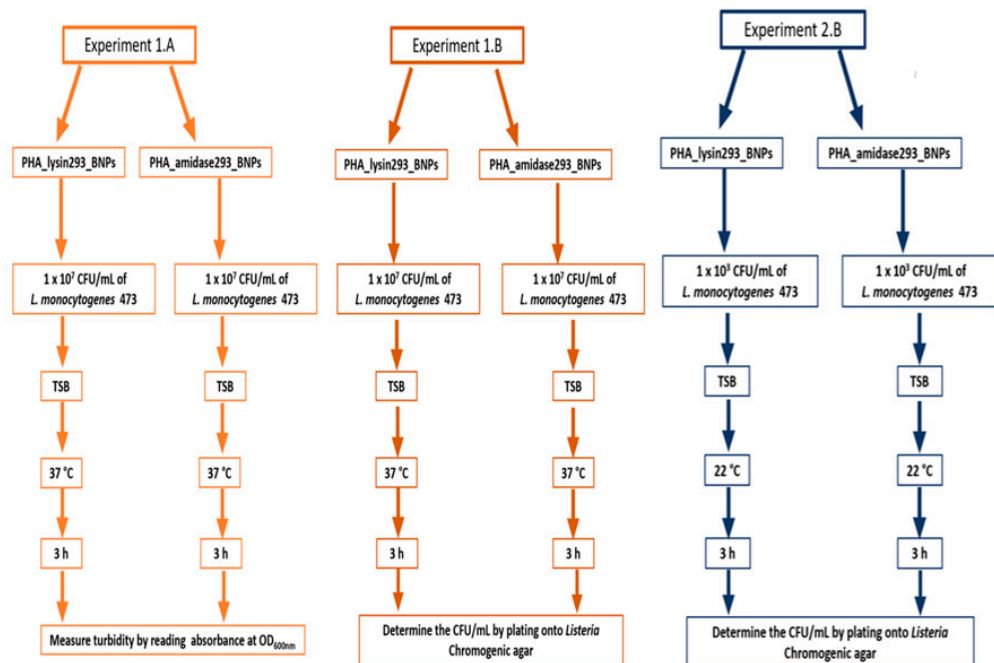

Figure S2: Flow chart depicting the experimental design of the assays. The flow chart shows the CFU/mL, temperature, incubation time, proteins used and the method to determine the CFU/mL or the turbidity of the samples in each experiment.
